# Supplementary material
Source: PubMed Central journal article supplement (PMC2943542)
Supplement: NIHMS233604-supplement-1_si_001.pdf [file NIHMS233604-supplement-1_si_001.pdf]

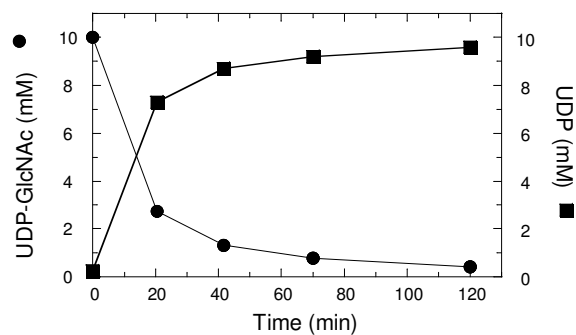

**Figure S1.** Preparative conversion of UDP-GlcNAc to GlcNAc-malate by *BaBshA* (ORF BA1558). Product was confirmed independently by NMR ( $^1\text{H}$ , gCOSY, and  $^{13}\text{C}$ ; Figure S2) and high resolution mass spectrometry.

**Figure S2.** NMR spectra of purified GlcNAc-malate (structure given in Figure S2A) synthesized enzymatically with *Ba*BshA as described in "Experimental Procedures" and Figure S1. (A) 500 MHz proton NMR spectrum and gradient COSY NMR correlation of GlcNAc-malate at pH 6-7. (B) 125 MHz carbon NMR spectrum at pH 6-7. <sup>1</sup>H NMR (500 MHz, D<sub>2</sub>O, trace sodium trifluoroacetate) δ ppm; 4.89 (d, *J* 3.8 Hz, 1H), 4.17 (dd, *J* 2.6, 11.1 Hz, 1H), 3.86-3.9 (m, 2H), 3.76-3.83 (m, 2H), 3.70 (dd, *J* 2.3, 12.5 Hz, 1H), 3.50 (dd, *J* 10.0, 8.8 Hz, 1H), 2.56 (dd, *J* 2.5, 15.0 Hz, 1H), 2.43 (dd, *J* 11.1, 15.0 Hz, 1H), 2.04 (s, 3H); <sup>13</sup>C NMR (125 MHz, D<sub>2</sub>O, trace sodium trifluoroacetate) δ ppm; 179.4, 178.3, 174.3, 99.0, 79.4, 72.2, 71.1, 69.4, 59.8, 53.5, 41.6, 21.9.

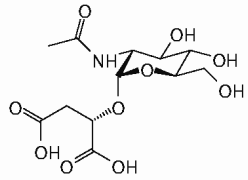

**A**

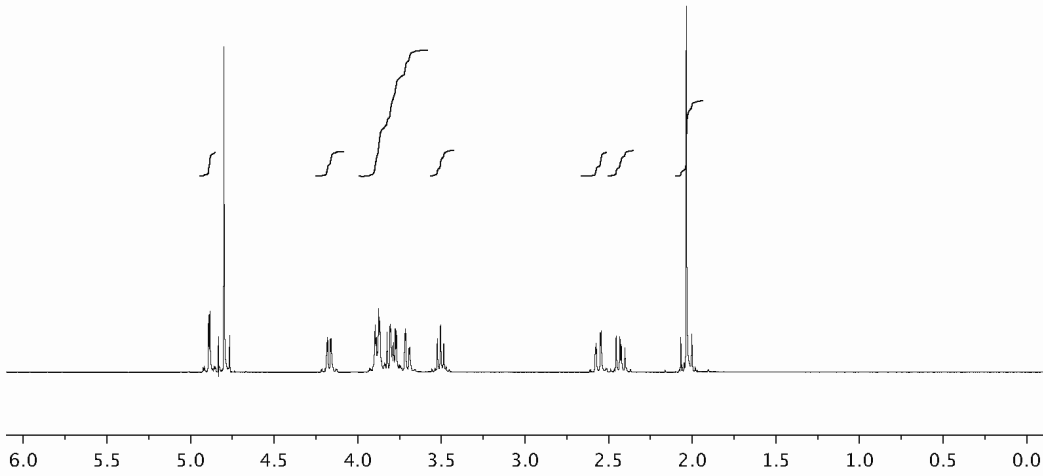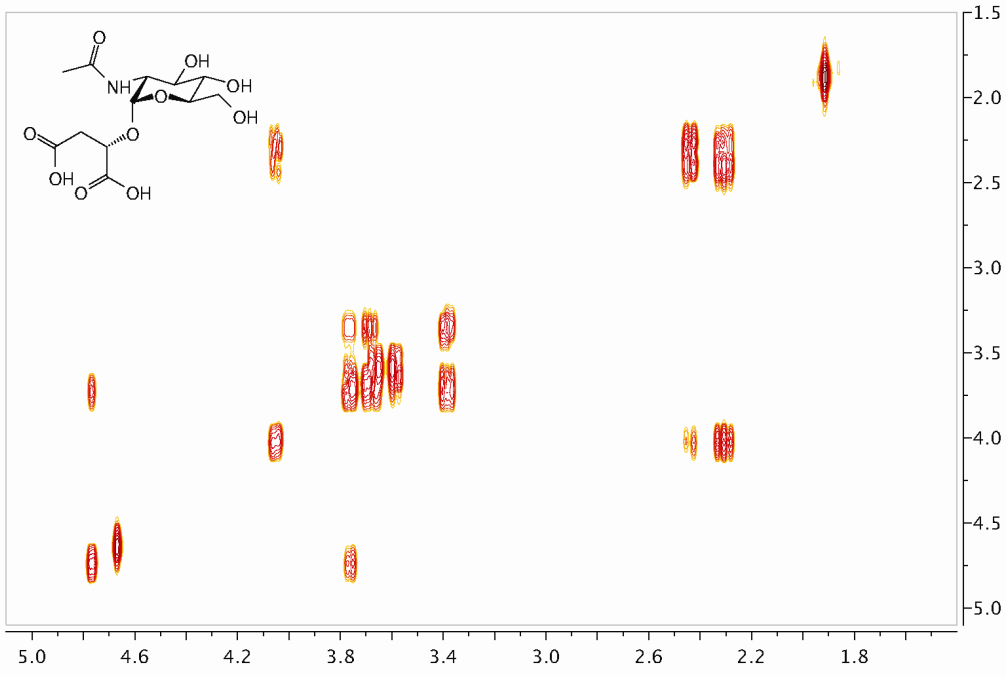

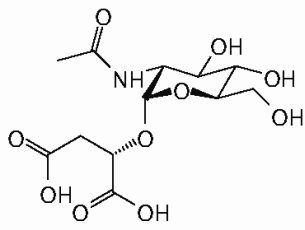

**B**

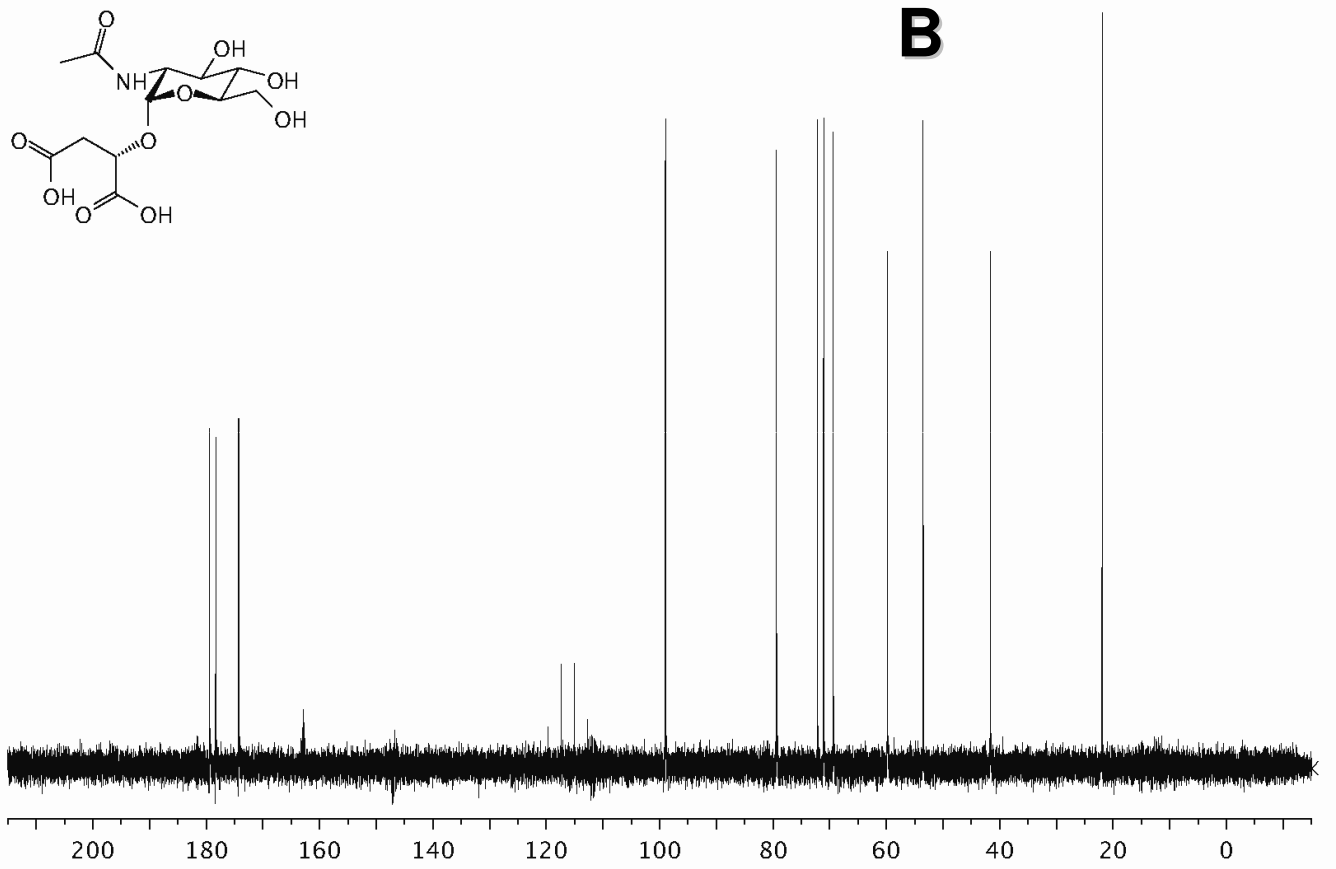

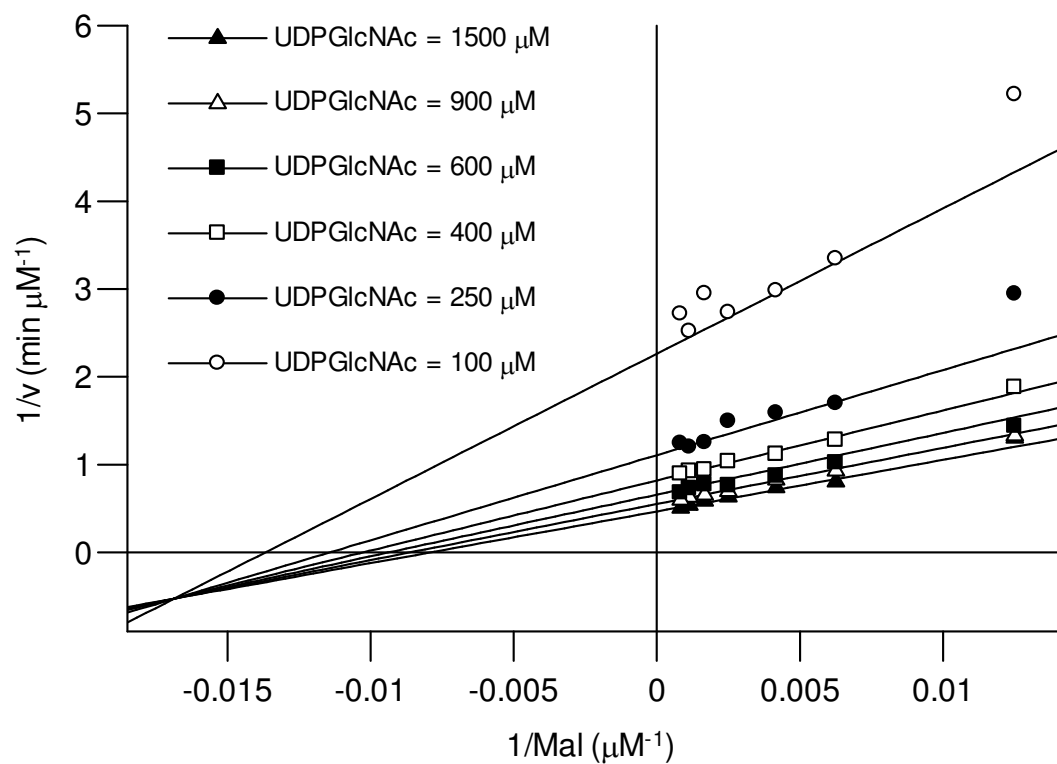

**Figure S3.** Initial velocity reciprocal plots of *BaBshA* activity. The [L-malate] was varied while [UDP-GlcNAc] was held constant at 1.5 mM (▲), 0.9 mM (△), 0.6 mM (■), 0.4 mM (□), 0.25 mM (●), or 0.1 mM (○). Solid lines are from fits of the data to equation 2.

Table S1: Primers Used in the Study

| Name           | Sequence                                             | Use                                            |
|----------------|------------------------------------------------------|------------------------------------------------|
| BAS1444up FWD  | CACACACAGCGGCCGCAAAGCAGCAAGGTCATCC                   | Construction and verification of $\Delta bshA$ |
| BAS1444up REV  | CTCATAAATCCTTCGGCATAACCCGGGCATCATAATTGTTCCCCTC       |                                                |
| BAS1444dwn FWD | CCCGGGTATGCCGAAGGATTTATGAG                           |                                                |
| BAS1444dwn REV | CACACACAGCGGCCGCAACATCAGATTGCTCAATACC                |                                                |
| BAS1444out FWD | CAGTAGGAACAATTATCGCTCC                               | Construction and verification of $\Delta bshB$ |
| BAS1444out REV | CACAACATCTTGACACAG                                   |                                                |
| BAS1445up FWD  | CACACACAGCGGCCGCGAGGGGAACAATTATGAGTG                 |                                                |
| BAS1445up REV  | CTGCTCGTAAACACTTTCTCTTCCCGGGCCAGAACCACCTACAGAAGG     |                                                |
| BAS1445dwn FWD | CCCGGGAAGAGAAAAGTGTTTACGAGCAG                        |                                                |
| BAS1445dwn REV | TATATATAGCGGCCGCTCCACTGTAATTCTCTCAATTGC              | Construction and verification of $\Delta cdr$  |
| BAS1445out FWD | CAATCTGGTCTCTTGGC                                    |                                                |
| BAS1445out REV | CCCATGCCTCAATGTCTG                                   |                                                |
| CoADR5f        | ATAAGAATGCGGCCGCGTGGTACGACTATTTTTGAGCGCATGATCTG      | Construction and verification of $\Delta cdr$  |
| CoADR5r        | CCGCTCGCTCCCGGGCACTTTACCACTCCTTCTTTTTTACATACTCTTTACG |                                                |
| CoADR3f        | GTGGTTAAAGTGCCCGGGAGGCGAGCGGAATAGCACTTTTTAAGTGC      |                                                |
| CoADR3r        | CGCGGATCCCATCAAATTCGATGTTTAGCTCCCTATATACTTTCTTCC     | Construction and verification of $\Delta cdr2$ |
| CDR-F          | CCGTATTAGACAGGAAAGCTAACGGC                           |                                                |
| CDR-R          | GCCCCCTGGTTCGTTTCATTGCTTTG                           |                                                |
| CDRRHD1        | TAATAGTGAGGATCCCCCGGGACAGTCTTACCAGAACGTATTGTAT       |                                                |
| CDRRHD2        | CCCGGGGGATCCTCACTATTATCCGCTACTACAACATTTTTTCTG        |                                                |
| CDRRHD3        | CGCGCGGCCGCGTACAGAGAATATTGTGTGTACTGA                 |                                                |
| CDRRHD4        | CGCGCGGCCGCATACATATACCTGTAGGGGTATAAT                 |                                                |
| CDRRHD5        | GTTCTGTGAATAAAAGAACAGGAAA                            |                                                |
| CDRRHD6        | CTTTTATACTCATAGTCGATTCTC                             |                                                |

Table S2: *BaBshA* (ORF BA1558) Acceptor Substrate Specificity

| Substrate <sup>a</sup> | Specific activity<br>(nmol/min/mg) | Relative rate |
|------------------------|------------------------------------|---------------|
| L-Malic acid           | 4800 ± 400                         | 100           |
| D-Malic acid           | 19 ± 4                             | 0.4           |
| Inositol 1-L-phosphate | 14 ± 4                             | 0.29          |
| D-Glyceric acid        | 20 ± 1                             | 0.42          |
| Glycolic acid          | 22 ± 2                             | 0.46          |
| D,L-Isocitric acid     | 22 ± 3                             | 0.46          |
| Citric acid            | 22 ± 2                             | 0.46          |
| D-Lactic acid          | 17 ± 2                             | 0.35          |

<sup>a</sup>0.1 mM Acceptor substrate with 3 mM UDP-GlcNAc, using *BaBshA* assay conditions described in "Experimental Procedures" (n = 3).
